# Supplementary material
Source: PubMed Central journal article supplement (PMC3717237)
Supplement: tjp0591-3433-SD1.pdf [file tjp0591-3433-SD1.pdf]

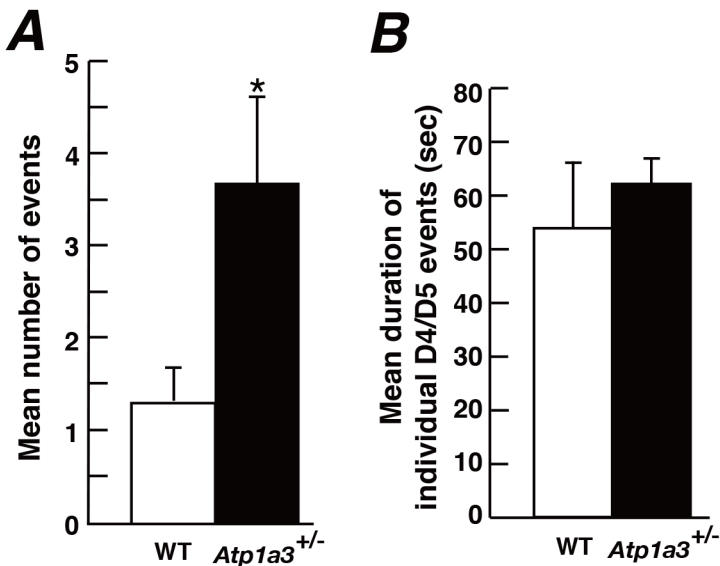

Fig. S1. Effects of injection of kainate into the cerebellum. **A**, Mean number of dystonic response with score D4/D5 (Pizoli *et al.* 2002) during 2hr observation. The number of events was significantly higher in *Atp1a3*<sup>+/-</sup> than WT. **B**, The mean duration of individual D4/D5 response was not different between *Atp1a3*<sup>+/-</sup> and WT.  $n = 16$  (WT) and  $n = 15$  (*Atp1a3*<sup>+/-</sup>). Data are mean  $\pm$  SEM. Open bars: WT, solid bars: *Atp1a3*<sup>+/-</sup>. \* $p < 0.05$ .

# Ikeda *et al.* Supplemental Fig.S2

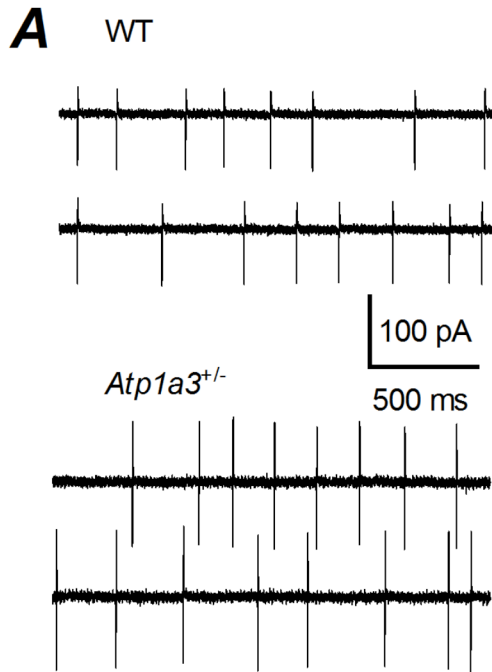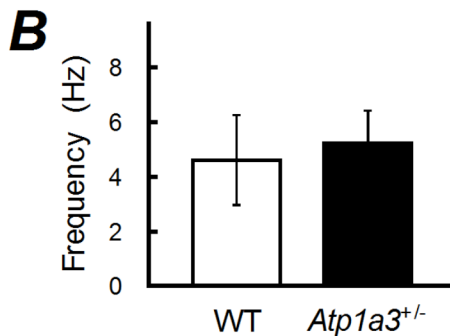

Fig. S2. Comparison of the spontaneous action potential firing of presynaptic ML interneurons in WT and *Atp1a3*<sup>+/-</sup>. **A**, Successive traces of spontaneously occurring action potentials recorded from single interneurons in WT and *Atp1a3*<sup>+/-</sup>. **B**, Summary of the action potential firing frequency of WT (open bar,  $n = 15$ ) and *Atp1a3*<sup>+/-</sup> (solid bar,  $n = 10$ ).
